# Supplementary material for: Derivation of CD8+ T cell infiltration potentiators in non-small-cell lung cancer through tumor microenvironment analysis
Source: PubMed Central journal article supplement — iScience. 2023 Jun 10;26(7):107095. doi: 10.1016/j.isci.2023.107095 (PMC10344796; doi:10.1016/j.isci.2023.107095), 2023-06-10
Supplement: mmc1.pdf [file mmc1.pdf]

**iScience, Volume 26**

**Supplemental information**

**Derivation of CD8<sup>+</sup> T cell infiltration  
potentiators in non-small-cell lung cancer  
through tumor microenvironment analysis**

**Michael J. Topper, Valsamo Anagnostou, Kristen A. Marrone, Victor E. Velculescu, Peter A. Jones, Julie R. Brahmer, Stephen B. Baylin, and Galen H. Hostetter**

A.

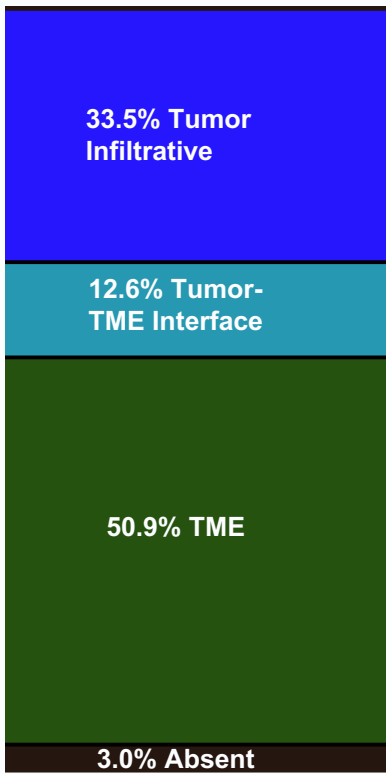

B.

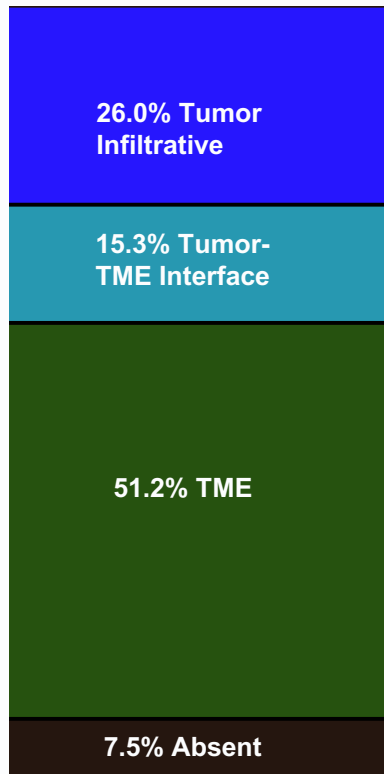

**Supplemental Figure 1: CD8<sup>+</sup> T cell localization status across LUAD and LUSC TMAs, Related to Figure 3.**

**A)** CD8<sup>+</sup> T cell infiltration status LUAD (n=128). **B)** CD8<sup>+</sup> T cell infiltration status LUSC (n=92).

A.

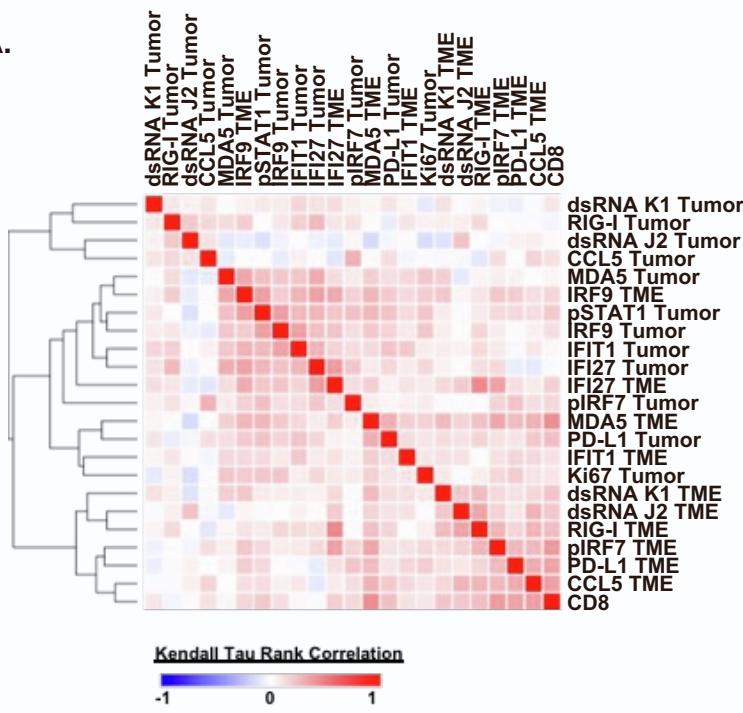

B.

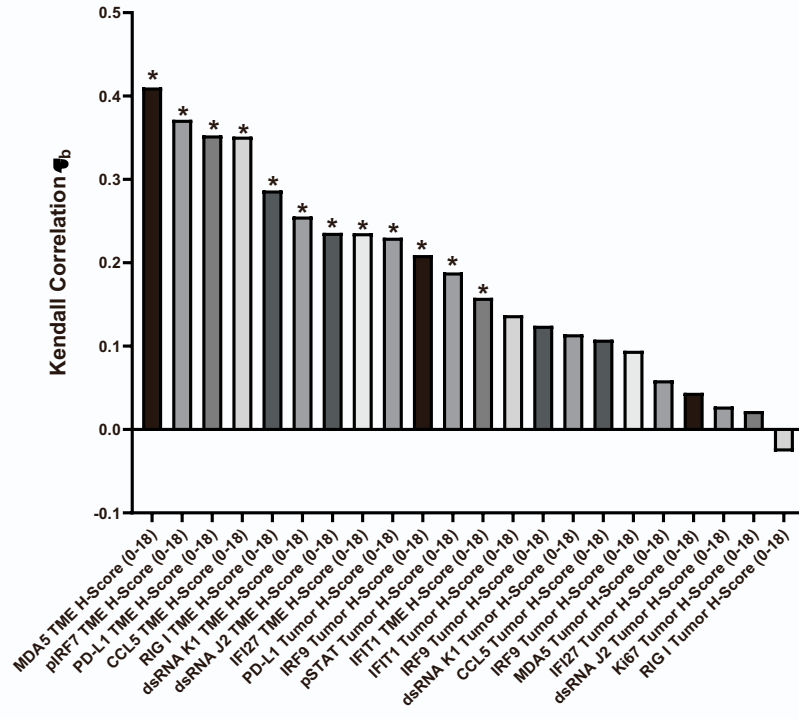

C.

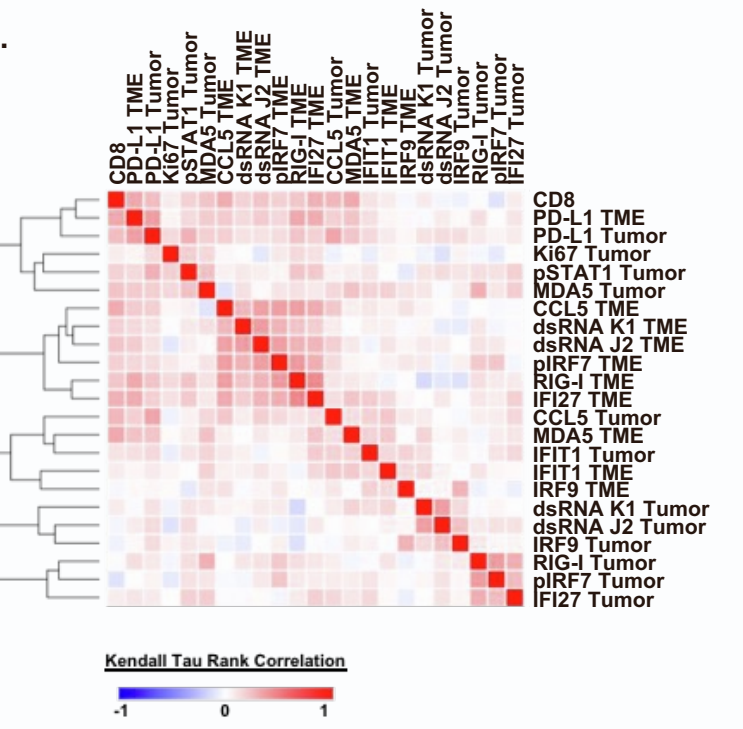

D.

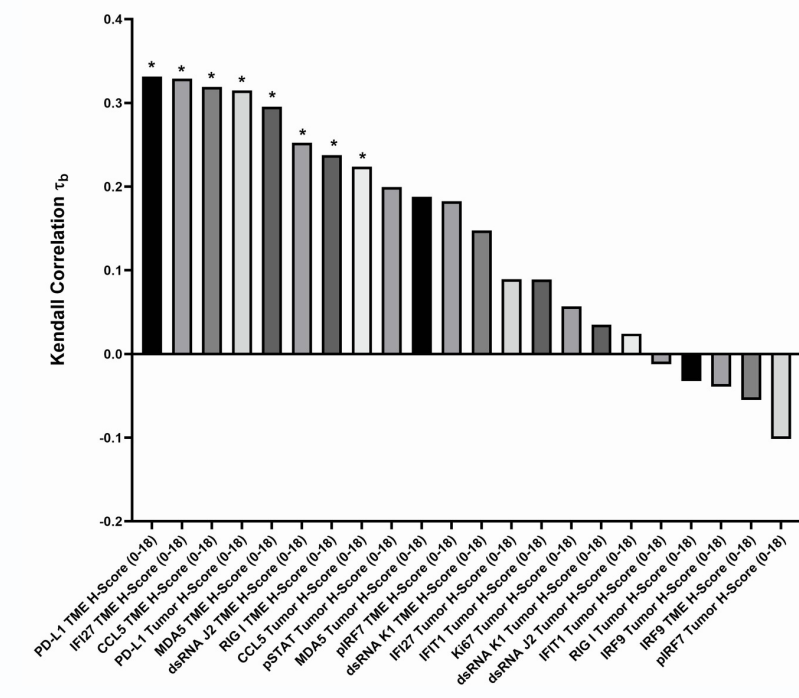

## **Supplemental Figure 2: IHC-based correlation analyses of CD8<sup>+</sup> vs immune and viral defense markers in LUAD TMAs, Related to Figure 3.**

**A)** LUAD H-score-based Kendall tau-b concordance similarity matrix, one minus Kendall tau-b concordance-based clustering (n=128). **B)** LUAD H-score-based Kendall tau-b concordance bar plot for panel markers vs CD8 $\alpha$  H-score, \* indicates adjusted p-value < 0.05 after FDR 0.05 multiple comparisons correction two-stage linear step-up procedure of Benjamini, Kriegerm and Yekutieli. **C)** LUSC H-score-based Kendall tau-b concordance similarity matrix, one minus Kendall tau-b concordance-based clustering (n=92). **D).** LUSC H-score-based Kendall tau-b concordance bar plot for panel markers vs CD8 $\alpha$  H-score, \* indicates an adjusted p-value < 0.05 after FDR 0.05 multiple comparisons correction two-stage linear step-up procedure of Benjamini, Kriegerm and Yekutieli.

A.

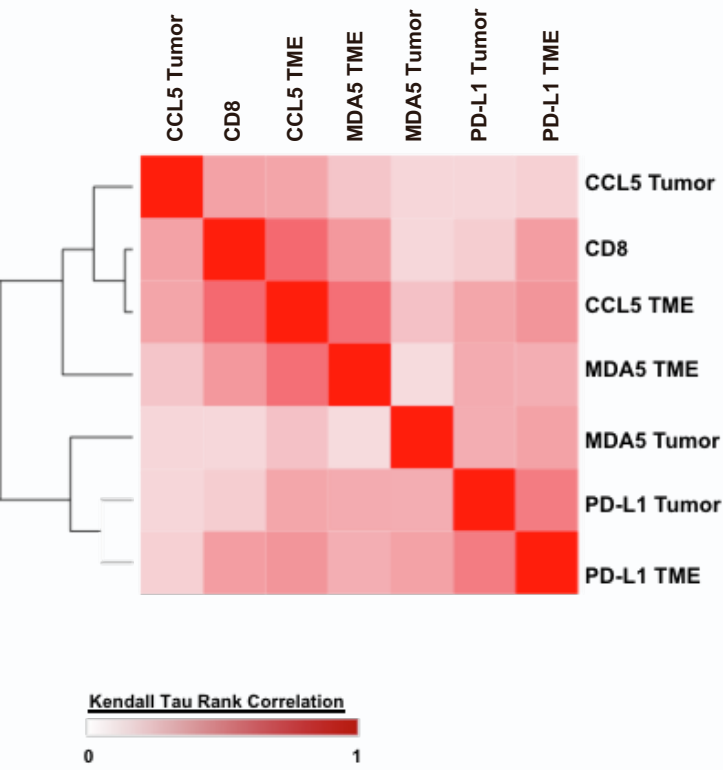

B.

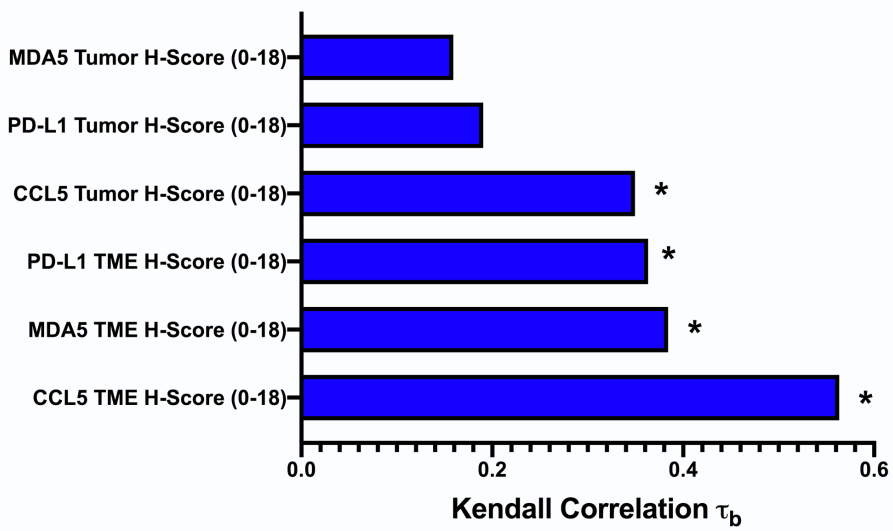

### **Supplemental Figure 3: IHC-based correlation analyses in NSCLC tumor biopsy validation cohort, Related to Figure 5.**

**A)** H-score-based Kendall tau-b concordance similarity matrix, one minus Kendall tau-b concordance-based clustering (n=63). **B)** H-score-based Kendall tau-b concordance bar plot for panel markers vs CD8 $\alpha$  H-score. \* indicates an adjusted p-value < 0.05 after FDR 0.05 multiple comparisons correction two-stage linear step-up procedure of Benjamini, Kriegerm, and Yekutieli (n=63).

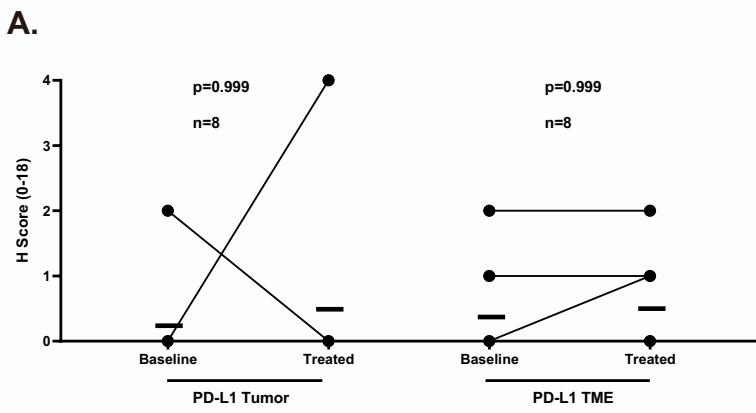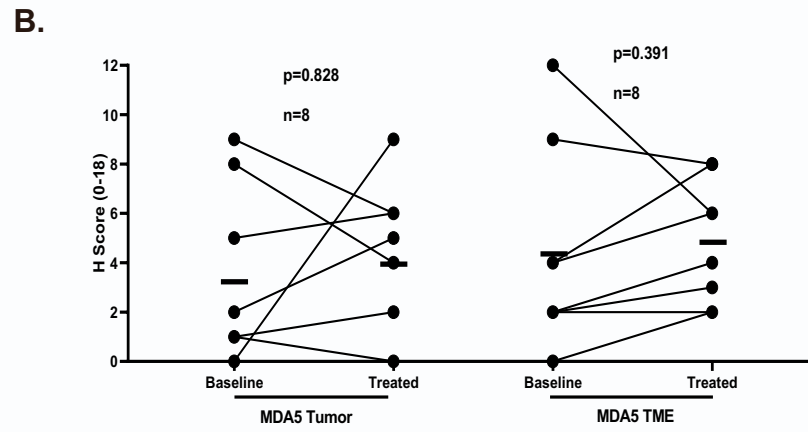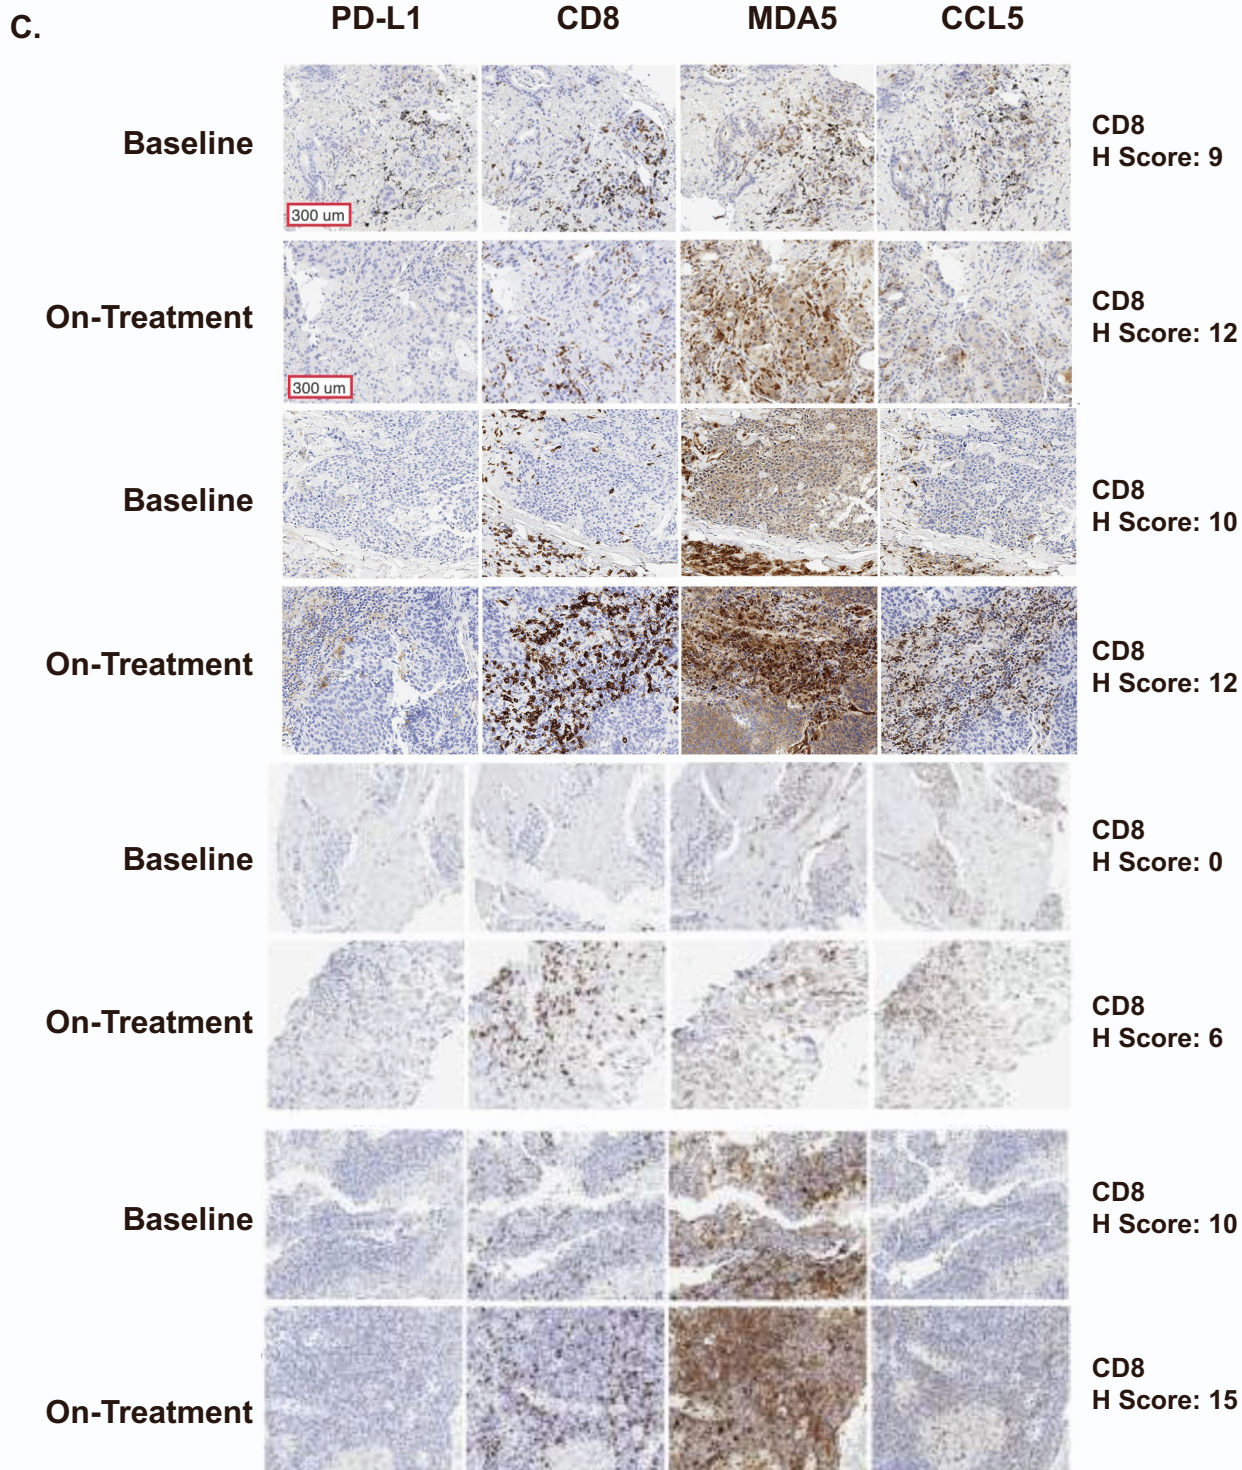



## **Supplemental Figure 4: Analysis of paired biopsies reveals epigenetic therapy-induced augmentation of both tumor accumulation and tumor infiltration of CD8<sup>+</sup> T cells, Related to Figures 6 and 7.**

**A).** PD-L1 H-score comparison baseline vs on-treatment (n=8 paired samples). Statistical significance by Wilcoxon Signed Ranked Test, mean and individual sample values are plotted. **B).** MDA5 H-score comparison baseline vs on-treatment (n=8 paired samples). Statistical significance by Wilcoxon Signed Ranked Test, mean and individual sample values are plotted. **C).** Expanded panel and larger field of single-plex IHC sections depicted in Figure 6 for CD8 and CCL5 alone and multiplex sections depicted in Figure 7 (Top 2 panels), and additional sections (bottom 2 panels) of clinical trial biopsies to show a prioritized 4-marker IHC panel. Representative scale bar provided in top left image of figure panel.

A.

| Subject | Pre & Post Epigenetic Priming/ treatment | H-Score CD8 (GH) | H-Score CCL5 tumor (GH) | H-Score CCL5 stroma (GH) | Aperio Algorithm, Multiplex Analysis | Total nuclei, hematoxylin (PC blue) | Percent magenta (CCL5) (PC red) | Percent DAB (CD8) (PC green) | Percent CCL5/CD8; Colocalized (PC yellow) | Total Stained Area (mm <sup>2</sup> ) | Total Analysis Area (mm <sup>2</sup> ) |
|---------|------------------------------------------|------------------|-------------------------|--------------------------|--------------------------------------|-------------------------------------|---------------------------------|------------------------------|-------------------------------------------|---------------------------------------|----------------------------------------|
| 1       | Pre                                      | 9                | 4                       | 3                        | CD8 CCL5                             | 97.0991                             | 0.136663                        | 2.65393                      | 0.11026                                   | 0.795647                              | 2.80635                                |
| 1       | Post                                     | 12               | 8                       | 9                        | CD8 CCL5                             | 90.5775                             | 0.437535                        | 7.95653                      | 1.02843                                   | 1.55649                               | 6.43151                                |
| 2       | Pre                                      | 1                | 1                       | 1                        | CD8 CCL5                             | 98.5633                             | 0.528358                        | 0.883917                     | 2.44E-02                                  | 0.69122                               | 3.58895                                |
| 2       | Post                                     | 2                | 1                       | 2                        | CD8 CCL5                             | 97.6687                             | 0.323731                        | 1.92605                      | 8.15E-02                                  | 0.427516                              | 2.74249                                |
| 3       | Pre                                      | 10               | 2                       | 4                        | CD8 CCL5                             | 82.9066                             | 2.42173                         | 11.5155                      | 3.15615                                   | 0.767931                              | 3.4669                                 |
| 3       | Post                                     | 12               | 0                       | 8                        | CD8 CCL5                             | 94.7671                             | 0.965191                        | 3.08314                      | 1.18461                                   | 3.80609                               | 8.46867                                |
| 4       | Pre                                      | 10               | 1                       | 2                        | CD8 CCL5                             | 93.4705                             | 1.03781                         | 4.65892                      | 0.832773                                  | 1.7724                                | 4.74249                                |
| 4       | Post                                     | 15               | 8                       | 3                        | CD8 CCL5                             | 87.8979                             | 2.38935                         | 7.66203                      | 2.05071                                   | 0.953868                              | 2.21517                                |
| 5       | Pre                                      | 0                | 0                       | 0                        | CD8 CCL5                             | 97.426                              | 0.548876                        | 1.86805                      | 0.15712                                   | 7.28E-02                              | 0.480357                               |
| 5       | Post                                     | 4                | 4                       | 3                        | CD8 CCL5                             | 98.289                              | 1.0778                          | 0.512253                     | 0.120989                                  | 1.20311                               | 6.72521                                |
| 6       | Pre                                      | 4                | 5                       | 2                        | CD8 CCL5                             | 92.3779                             | 1.35268                         | 4.96858                      | 1.30087                                   | 0.197838                              | 1.31737                                |
| 6       | Post                                     | 6                | 4                       | 3                        | CD8 CCL5                             | 88.9628                             | 7.91251                         | 2.92017                      | 0.204489                                  | 0.754542                              | 4.04813                                |
| 7       | Pre                                      | 0                | 6                       | 1                        | CD8 CCL5                             | 97.9027                             | 1.64234                         | 0.387532                     | 6.74E-02                                  | 0.45974                               | 3.62186                                |
| 7       | Post                                     | 6                | 1                       | 2                        | CD8 CCL5                             | 93.2436                             | 0.406604                        | 4.85804                      | 1.49174                                   | 0.156371                              | 0.958558                               |
| 8       | Pre                                      | 1                | 3                       | 1                        | CD8 CCL5                             | 97.0351                             | 2.88159                         | 6.98E-02                     | 1.36E-02                                  | 0.143639                              | 0.639019                               |
| 8       | Post                                     | 0                | 0                       | 1                        | CD8 CCL5                             | 97.1685                             | 2.15412                         | 0.472727                     | 0.204648                                  | 1.4812                                | 7.05401                                |
| 9       | Pre                                      | 8                | 0                       | 1                        | CD8 CCL5                             | 92.6226                             | 4.17441                         | 1.44607                      | 1.75688                                   | 72.5127                               | 268.409                                |
| 9       | Post                                     | 3                | 6                       | 9                        | CD8 CCL5                             | 97.4823                             | 0.187465                        | 2.02331                      | 0.306932                                  | 2.17162                               | 7.97423                                |
| 10      | Pre                                      | 12               | 2                       | 10                       | CD8 CCL5                             | 27.6166                             | 52.5501                         | 6.57707                      | 13.2562                                   | 1.90027                               | 3.83065                                |
| 10      | Post                                     | 12               | 8                       | 10                       | CD8 CCL5                             | 38.973                              | 34.7689                         | 10.0566                      | 16.2015                                   | 3.1248                                | 7.04703                                |
| 11      | Pre                                      | 10               | 6                       | 2                        | CD8 CCL5                             | 81.9337                             | 7.28E-02                        | 14.0342                      | 3.95929                                   | 0.603883                              | 1.98084                                |
| 11      | Post                                     | 15               | 8                       | 12                       | CD8 CCL5                             | 70.0331                             | 3.07642                         | 18.5512                      | 8.33931                                   | 1.95878                               | 7.71406                                |
| 12      | Pre                                      | 12               | 3                       | 3                        | CD8 CCL5                             | 45.7451                             | 43.8879                         | 4.06869                      | 6.29825                                   | 0.533791                              | 1.33104                                |
| 12      | Post                                     | 15               | 8                       | 3                        | CD8 CCL5                             | 41.8109                             | 33.3529                         | 9.93727                      | 14.8989                                   | 0.849029                              | 2.42247                                |

B.

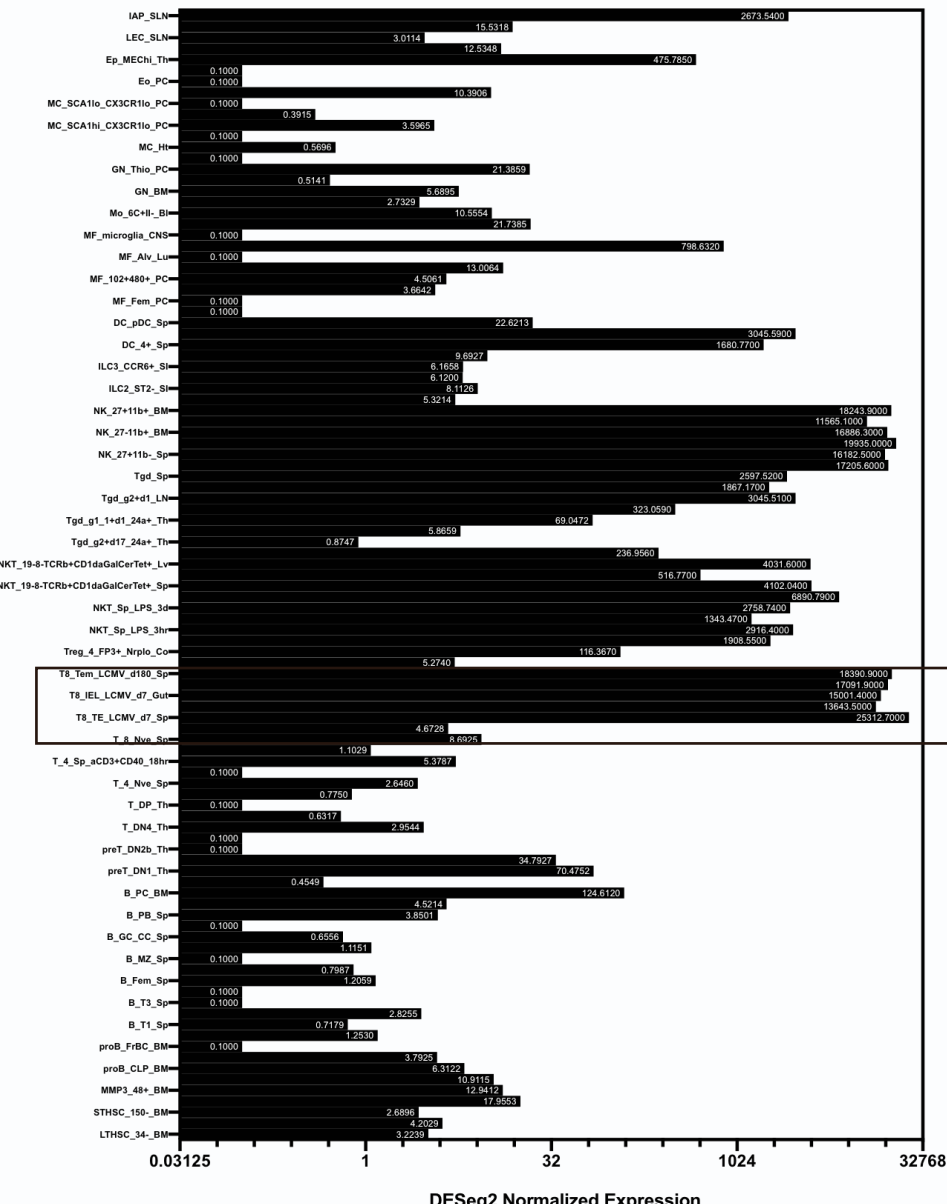

C.

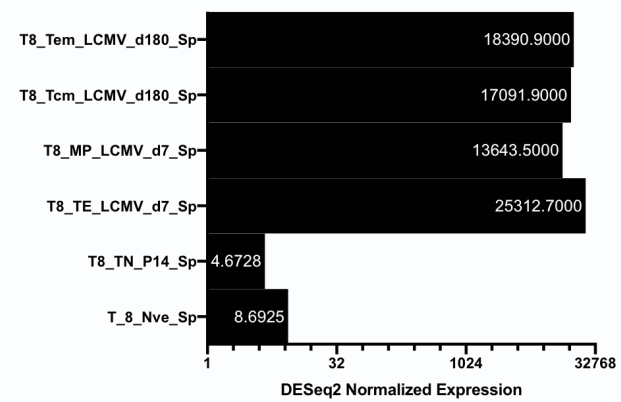

## Supplemental Figure 5: CD8 and CCL5 correlative behavior in NSCLC clinical trial samples, Related to Figure 7

**A).** Baseline and on-treatment summary table for CD8 and CCL5 H-score and Aperio quantitation of multiplex IHC, provided subject IDs are arbitrary and provided to assist in matching samples. **B).** DESeq2 normalized CCL5 expression across immune populations as deposited into ImmGen database x-axis: CCL5 DESeq2 normalized expression RNA-seq data, y-axis: ImmGen annotated immune populations. **C).** DESeq2 normalized CCL5 expression across CD8 T cell experimental populations. CD8 T cell-specific data from experimental murine models as provided by the Immgen database. X-axis: CCL5 DESeq2 normalized expression RNA-seq data, y-axis: Spleen-derived CD8<sup>+</sup> T cell populations.

A.

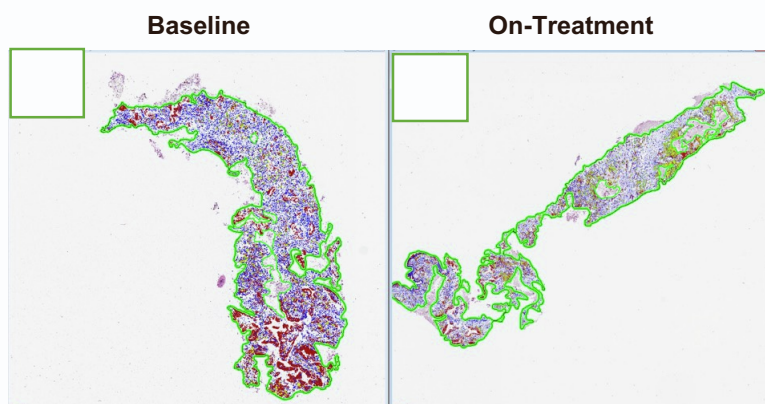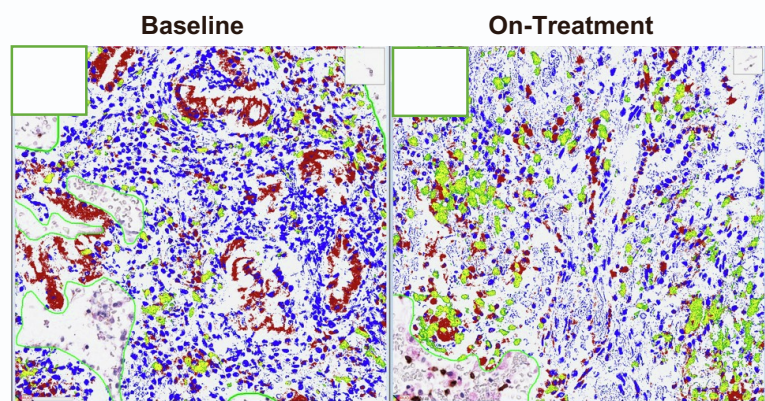

| Pre & Post Epigenetic Priming/ treatment | H-Score CD8 (GH) | H-Score CCL5 tumor (GH) | H-Score CCL5 stroma (GH) | Aperio Algorithm, Multiplex Analysis | Total nuclei, hematoxylin (PC blue) | Percent magenta (CCL5) (PC red) | Percent DAB (CD8) (PC green) | Percent CCL5/CD8; Colocalized (PC yellow) | Total Stained Area (mm <sup>2</sup> ) | Total Analysis Area (mm <sup>2</sup> ) |
|------------------------------------------|------------------|-------------------------|--------------------------|--------------------------------------|-------------------------------------|---------------------------------|------------------------------|-------------------------------------------|---------------------------------------|----------------------------------------|
| Pre                                      | 12               | 3                       | 3                        | CD8 CCL5                             | 45.7451                             | 43.8879                         | 4.06869                      | 6.29825                                   | 0.533791                              | 1.33104                                |
| Post                                     | 15               | 8                       | 3                        | CD8 CCL5                             | 41.8109                             | 33.3529                         | 9.93727                      | 14.8989                                   | 0.849029                              | 2.42247                                |

B.

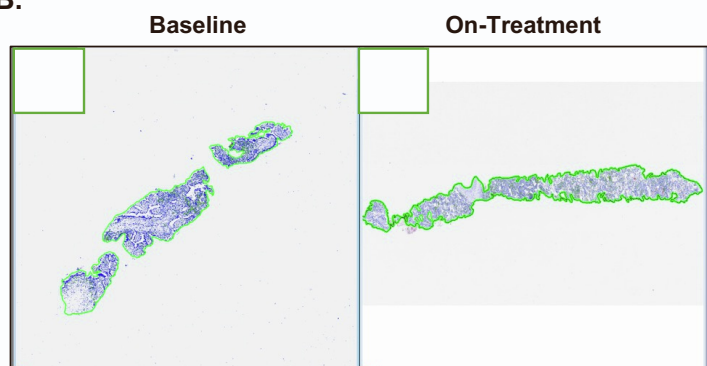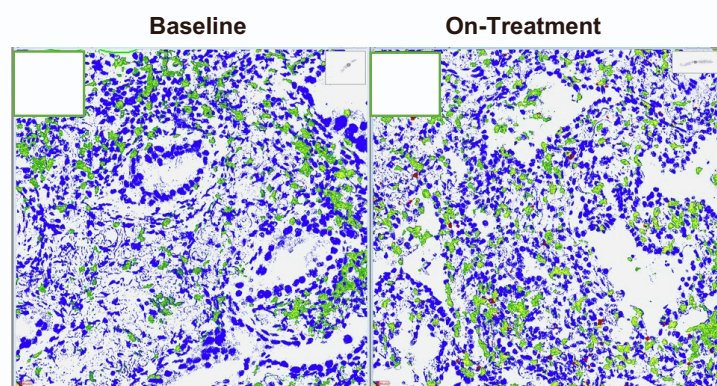

| Pre & Post Epigenetic Priming/ treatment | H-Score CD8 (GH) | H-Score CCL5 tumor (GH) | H-Score CCL5 stroma (GH) | Aperio Algorithm, Multiplex Analysis | Total nuclei, hematoxylin (PC blue) | Percent magenta (CCL5) (PC red) | Percent DAB (CD8) (PC green) | Percent CCL5/CD8; Colocalized (PC yellow) | Total Stained Area (mm <sup>2</sup> ) | Total Analysis Area (mm <sup>2</sup> ) |
|------------------------------------------|------------------|-------------------------|--------------------------|--------------------------------------|-------------------------------------|---------------------------------|------------------------------|-------------------------------------------|---------------------------------------|----------------------------------------|
| Pre                                      | 10               | 6                       | 2                        | CD8 CCL5                             | 81.9337                             | 7.28E-02                        | 14.0342                      | 3.95929                                   | 0.603883                              | 1.98084                                |
| Post                                     | 15               | 8                       | 12                       | CD8 CCL5                             | 70.0331                             | 3.07642                         | 18.5512                      | 8.33931                                   | 1.95878                               | 7.71406                                |

C.

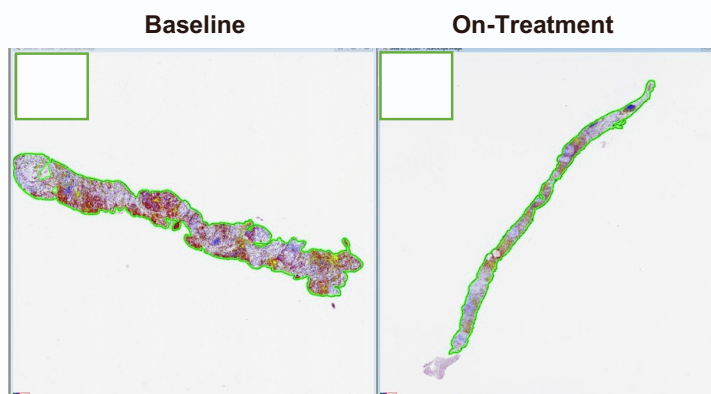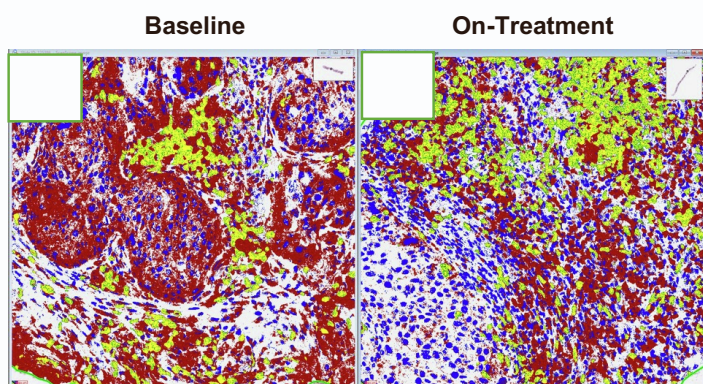

| Pre & Post Epigenetic Priming/ treatment | H-Score CD8 (GH) | H-Score CCL5 tumor (GH) | H-Score CCL5 stroma (GH) | Aperio Algorithm, Multiplex Analysis | Total nuclei, hematoxylin (PC blue) | Percent magenta (CCL5) (PC red) | Percent DAB (CD8) (PC green) | Percent CCL5/CD8; Colocalized (PC yellow) | Total Stained Area (mm <sup>2</sup> ) | Total Analysis Area (mm <sup>2</sup> ) |
|------------------------------------------|------------------|-------------------------|--------------------------|--------------------------------------|-------------------------------------|---------------------------------|------------------------------|-------------------------------------------|---------------------------------------|----------------------------------------|
| Pre                                      | 12               | 2                       | 10                       | CD8 CCL5                             | 27.6166                             | 52.5501                         | 6.57707                      | 13.2562                                   | 1.90027                               | 3.83065                                |
| Post                                     | 12               | 8                       | 10                       | CD8 CCL5                             | 38.973                              | 34.7689                         | 10.0566                      | 16.2015                                   | 3.1248                                | 7.04703                                |

D.

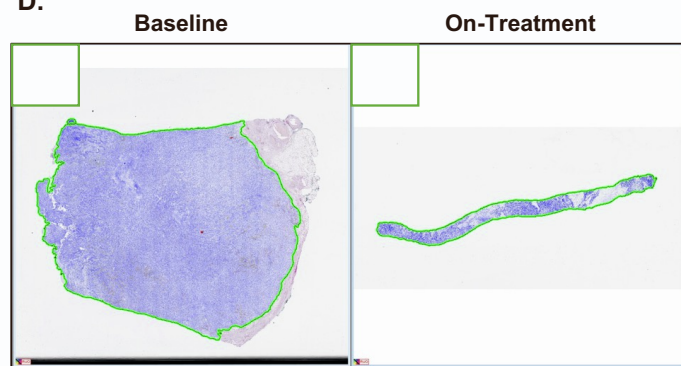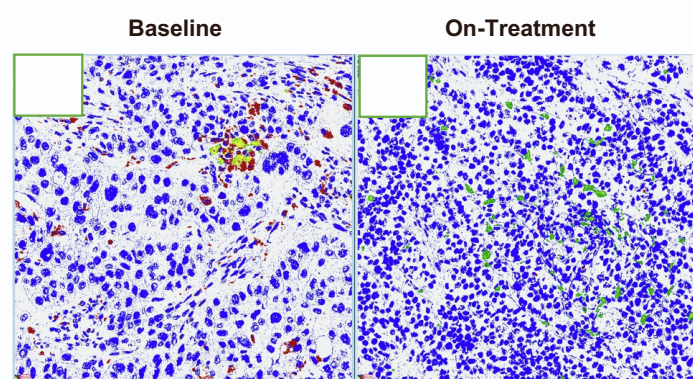

| Pre & Post Epigenetic Priming/ treatment | H-Score CD8 (GH) | H-Score CCL5 tumor (GH) | H-Score CCL5 stroma (GH) | Aperio Algorithm, Multiplex Analysis | Total nuclei, hematoxylin (PC blue) | Percent magenta (CCL5) (PC red) | Percent DAB (CD8) (PC green) | Percent CCL5/CD8; Colocalized (PC yellow) | Total Stained Area (mm <sup>2</sup> ) | Total Analysis Area (mm <sup>2</sup> ) |
|------------------------------------------|------------------|-------------------------|--------------------------|--------------------------------------|-------------------------------------|---------------------------------|------------------------------|-------------------------------------------|---------------------------------------|----------------------------------------|
| Pre                                      | 8                | 0                       | 1                        | CD8 CCL5                             | 92.6226                             | 4.17441                         | 1.44607                      | 1.75686                                   | 72.5127                               | 268.409                                |
| Post                                     | 3                | 6                       | 9                        | CD8 CCL5                             | 97.4823                             | 0.187465                        | 2.02331                      | 0.306932                                  | 2.17162                               | 7.97423                                |

**Supplemental Figure 6: Concurrent epigenetic immunotherapy in advanced NSCLC clinical trial specimens case studies, Related to Figure 8.**

**A-D).** CD8 $\alpha$  and CCL5 multiplex IHC, representative whole sections and enhanced image size for case studies in Figure 8. Top panel: whole section, bottom panel: Region of interest, 200x magnification, left panel: Baseline, right panel: on-treatment combination epigenetic treatment (Azacitidine + Entinostat). CD8 $\alpha$  + CCL5 multiplex IHC pseudo-colored (green= CD8 $\alpha$ , red=CCL5, and yellow=CD8 $\alpha$ +CCL5 co-localization).

A.

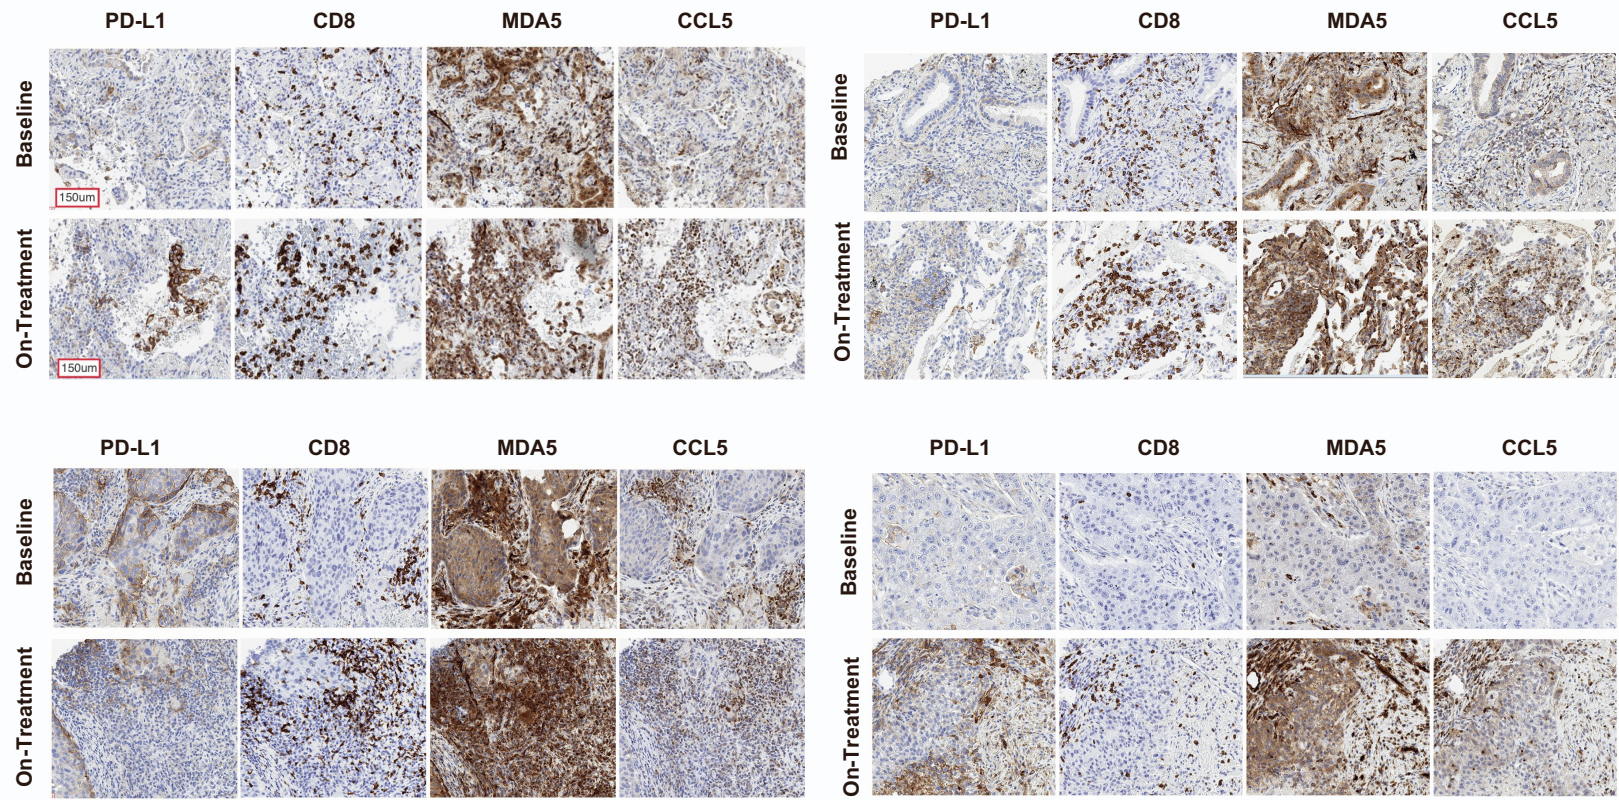

**Supplemental Figure 7: Single-plex IHC, concurrent epigenetic immunotherapy in advanced NSCLC clinical trial specimens case studies, Related to Figure 8.**

**A).** Larger field and expanded panel single-plex IHC sections corresponding to sections presented as case studies in Figure 8. Clinical trial biopsy to show the prioritized 4-marker IHC panel. All IHC stains were scored by modified H-score with a primary focus on CD8 cells and tumor infiltrative pattern. 200x magnification.

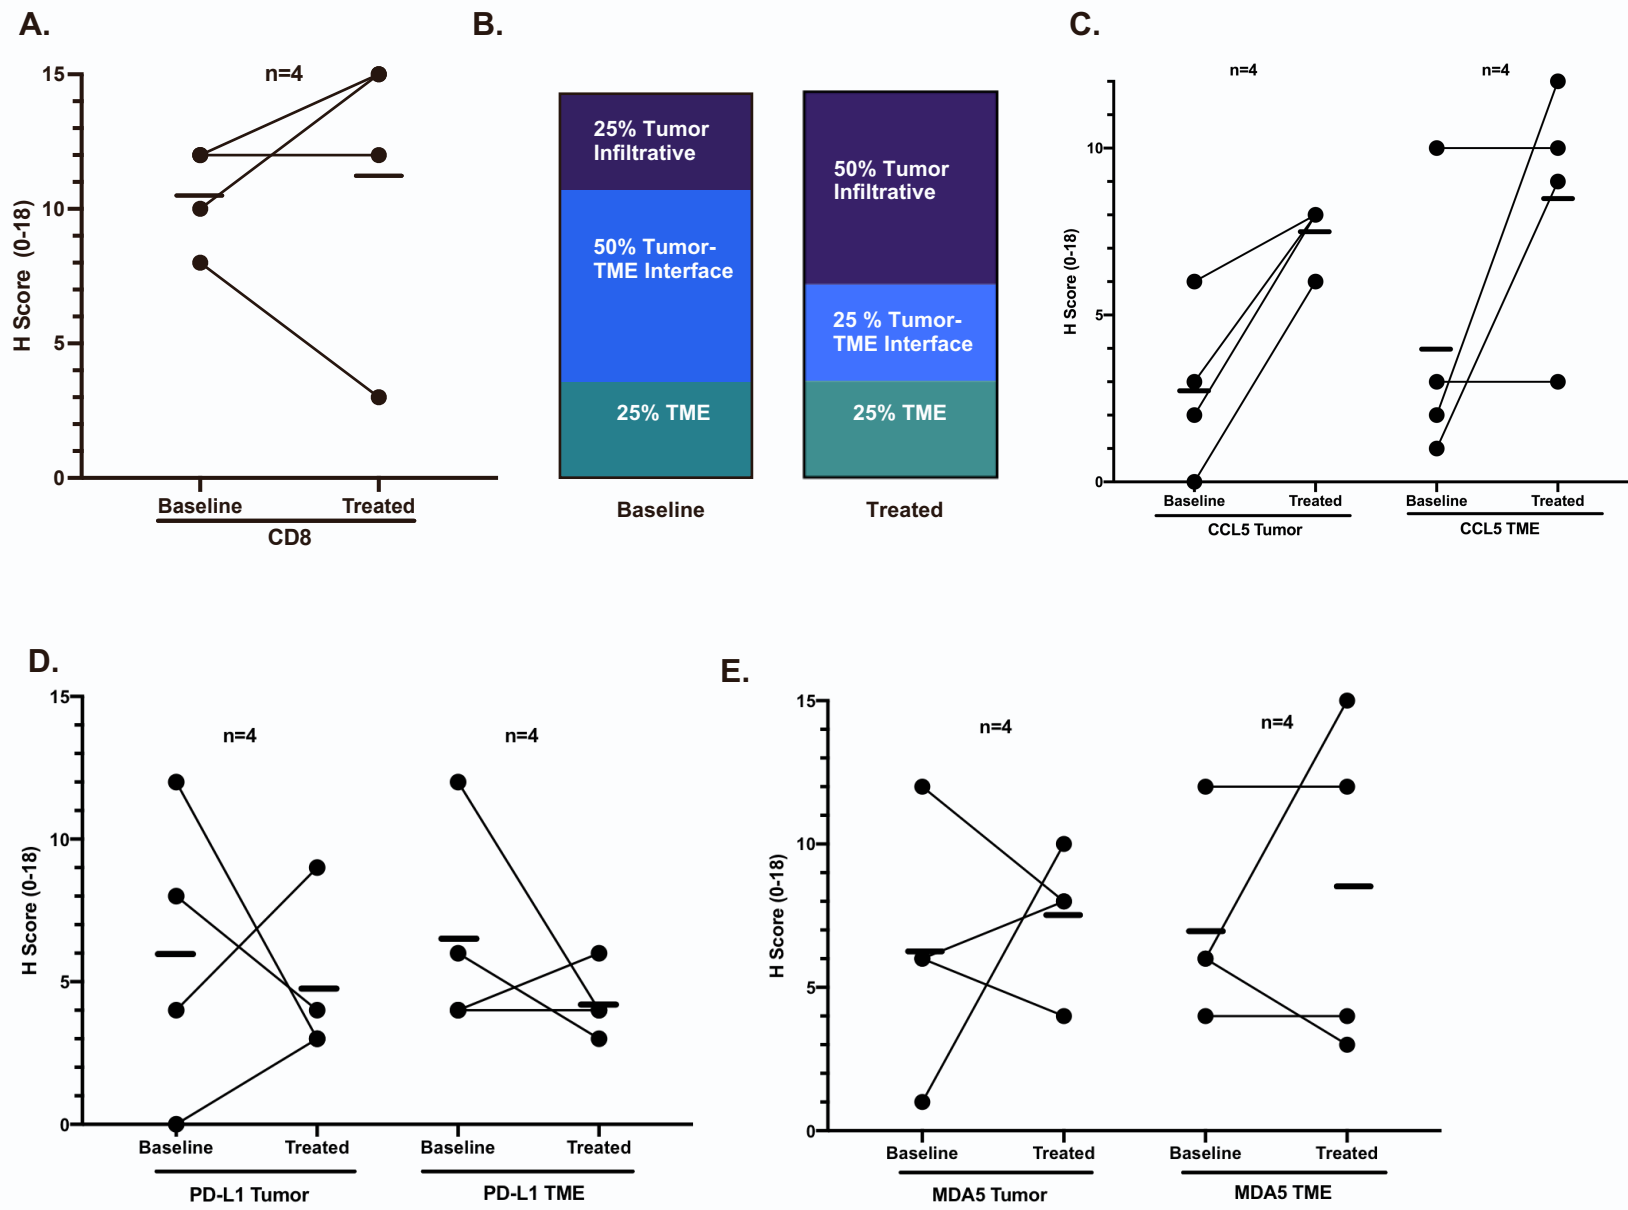



**Supplemental Figure 8: Single-plex summary IHC Concurrent epigenetic immunotherapy in advanced NSCLC clinical trial specimens case studies, Related to Figure 8.**

**A).** CD8 $\alpha$  H-score comparison baseline vs on-treatment (n=4 paired samples), mean and individual sample values are plotted. **B).** CD8<sup>+</sup> infiltration status baseline vs. on-treatment (n=4 paired samples). **C).** CCL5 H-score comparison baseline vs on-treatment (n=4 paired samples), mean and individual sample values are plotted. **D).** PD-L1 H-score comparison baseline vs on-treatment (n=4 paired samples), mean and individual sample values are plotted. **E).** MDA5 H-score comparison baseline vs on-treatment (n=4 paired samples), mean and individual sample values are plotted.
